# Supplementary material for: RhizoVision Explorer: open-source software for root image analysis and measurement standardization
Source: PubMed Central journal article supplement (PMC8598384; doi:10.1093/aobpla/plab056), 2021-09-13
Supplement: plab056_suppl_supplementary_materials.pdf [file plab056_suppl_supplementary_materials.pdf]

**Supplemental Table 1.** Combinations of 12 wires used for the copper wire image data set, ranging from 1 to 12 wires in a scan. For each of 6 wire gauges (diameters), two wires of approximately 30 cm length were used and denoted as wire 1 or 2. File names for the scans indicate combinations of the gauges and wire numbers used, and the number (#) of wires in a scan are provided.

| AWG Gauge              | File Name                                                       | #  |
|------------------------|-----------------------------------------------------------------|----|
| 40                     | G_40_W1_600_dpi.tif                                             | 1  |
| 40                     | G_40_W2_600_dpi.tif                                             | 1  |
| 32                     | G_32_W1_600_dpi.tif                                             | 1  |
| 32                     | G_32_W2_600_dpi.tif                                             | 1  |
| 28                     | G_28_W1_600_dpi.tif                                             | 1  |
| 28                     | G_28_W2_600_dpi.tif                                             | 1  |
| 22                     | G_22_W1_600_dpi.tif                                             | 1  |
| 22                     | G_22_W2_600_dpi.tif                                             | 1  |
| 16                     | G_16_W1_600_dpi.tif                                             | 1  |
| 16                     | G_16_W2_600_dpi.tif                                             | 1  |
| 10                     | G_10_W1_600_dpi.tif                                             | 1  |
| 10                     | G_30_W2_600_dpi.tif                                             | 1  |
| 40                     | MD_40_40_W12_600_dpi.tif                                        | 2  |
| 40, 32                 | Mixed_40_32_W1_600_dpi.tif                                      | 2  |
| 40, 32                 | Mixed_40_32_W2_600_dpi.tif                                      | 2  |
| 40, 32                 | MD_40_32_40_32_W1122_600_dpi.tif                                | 4  |
| 40, 32, 28             | Mixed_40_32_28_W1_600_dpi.tif                                   | 3  |
| 40, 32, 28             | Mixed_40_32_28_W2_600_dpi.tif                                   | 3  |
| 40, 32, 28             | MD_40_32_28_40_32_28_W111222_600_dpi.tif                        | 6  |
| 40, 32, 28, 22         | Mixed_40_32_28_22_W1_600_dpi.tif                                | 4  |
| 40, 32, 28, 22         | Mixed_40_32_28_22_W2_600_dpi.tif                                | 4  |
| 40, 32, 28, 22         | MD_40_32_28_22_40_32_28_22_W11112222_600_dpi.tif                | 8  |
| 40, 32, 28, 22, 16     | Mixed_40_32_28_22_16_W1_600_dpi.tif                             | 5  |
| 40, 32, 28, 22, 16     | Mixed_40_32_28_22_16_W2_600_dpi.tif                             | 5  |
| 40, 32, 28, 22, 16     | MD_40_32_28_22_16_40_32_28_22_16_W1111122222_600_dpi.tif        | 10 |
| 40, 32, 28, 22, 16, 10 | Mixed_40_32_28_22_16_10_W1_600_dpi.tif                          | 6  |
| 40, 32, 28, 22, 16, 10 | Mixed_40_32_28_22_16_10_W2_600_dpi.tif                          | 6  |
| 40, 32, 28, 22, 16, 10 | MD_40_32_28_22_16_10_40_32_28_22_16_10_W11111122222_600_dpi.tif | 12 |
